# Supplementary material for: Par6G suppresses cell proliferation and is targeted by loss-of-function mutations in multiple cancers
Source: PubMed Central journal article supplement — Oncogene. 2015 Jun 15;35(11):1386–98. doi: 10.1038/onc.2015.196 (PMC4800288; doi:10.1038/onc.2015.196), 2015-06-15
Supplement: onc2015196x4.pdf [file onc2015196x4.pdf]

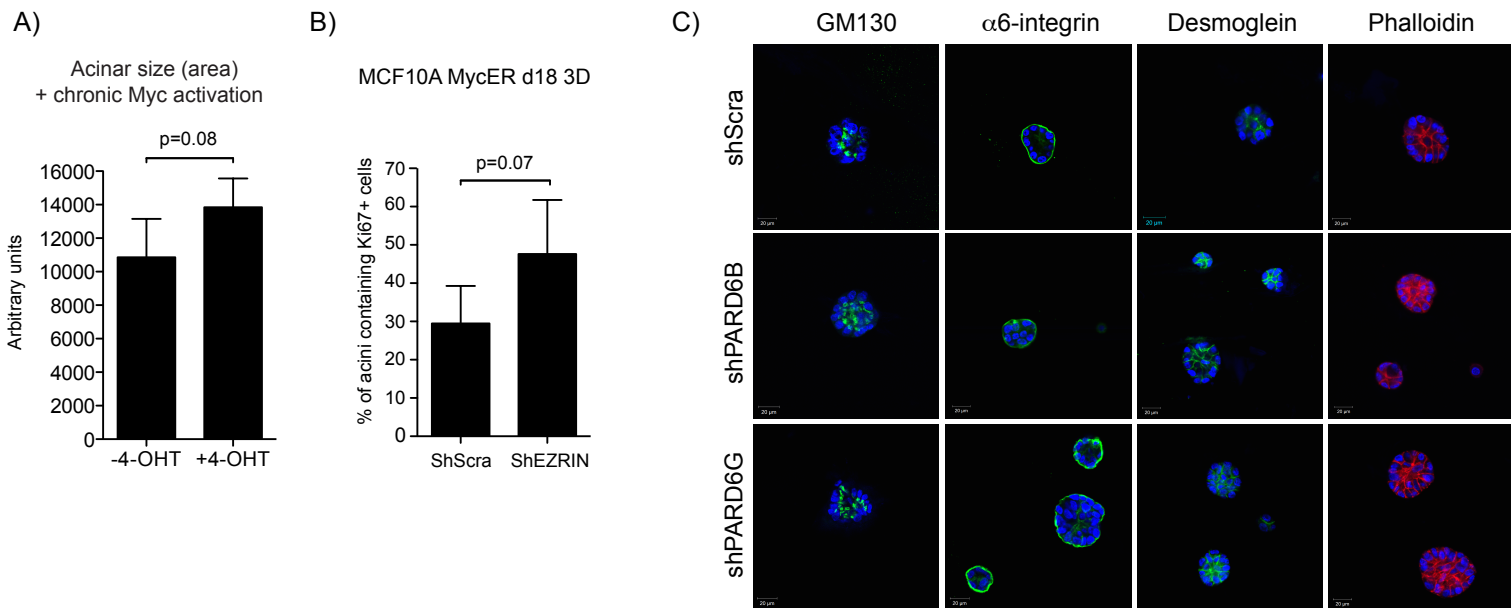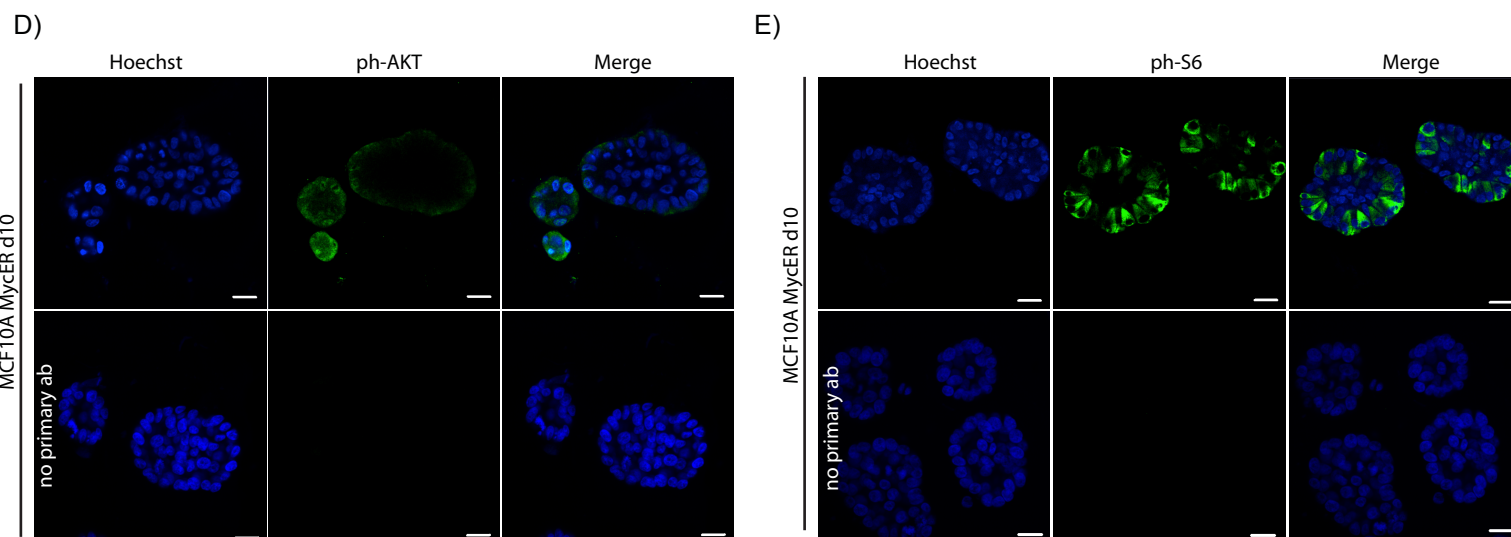

**F)**

| Cancer type:                | Cosmic    |               |            |            |               | OncoPrint |     |         | CONAN cancer cell lines |     |     |               |
|-----------------------------|-----------|---------------|------------|------------|---------------|-----------|-----|---------|-------------------------|-----|-----|---------------|
|                             | Mut (No.) | Samples (No.) | Loss (No.) | Gain (No.) | Samples (No.) | down      | up  | total A | LOH                     | Del | Amp | Samples (No.) |
| <b>PARD6B</b>               |           |               |            |            |               |           |     |         |                         |     |     |               |
| Breast                      | 3         | 978           | 30         | 323        | 852           | 0         | 7   | 45      | 3                       | 0   | 2   | 43            |
| Cervix                      | 0         | 14            | n/a        | n/a        | n/a           | 1         | 0   | 10      |                         |     |     |               |
| Haematopoietic and lymphoid | 0         | 1057          | 3          | 1          | 192           |           |     |         | 4                       | 0   | 0   | 121           |
| Kidney                      | 4         | 475           | 1          | 50         | 300           | 1         | 2   | 24      |                         |     |     |               |
| Lung                        | 4         | 861           | 68         | 157        | 476           | 4         | 1   | 30      | 14                      | 0   | 1   | 136           |
| Liver                       | 1         | 424           | n/a        | n/a        | n/a           | n/a       | n/a | n/a     | 0                       | 0   | 1   | 8             |
| NS                          | 1         | 235           | 0          | 5          | 30            |           |     |         | 7                       | 0   | 3   | 255           |
| Oesophagus                  | 0         | 173           | n/a        | n/a        | n/a           |           |     |         | 2                       | 0   | 0   | 23            |
| Ovary                       | 0         | 504           | 21         | 255        | 462           | n/a       | n/a | n/a     | 4                       | 0   | 0   | 33            |
| Pancreas                    | 0         | 388           | n/a        | n/a        | n/a           | n/a       | n/a | n/a     | 0                       | 0   | 1   | 17            |
| Prostate                    | 0         | 384           | n/a        | n/a        | n/a           | 1         | 0   | 19      |                         |     |     |               |
| Skin                        | 1         | 321           | n/a        | n/a        | n/a           |           |     |         | 1                       | 0   | 0   | 46            |
| Soft tissue                 | 0         | 16            | n/a        | n/a        | n/a           |           |     |         | 0                       | 0   | 1   | 18            |
| Stomach                     | 1         | 47            | n/a        | n/a        | n/a           |           |     |         | 4                       | 0   | 0   | 20            |
| Urinary tract               | 2         | 103           | n/a        | n/a        | n/a           |           |     |         | 0                       | 0   | 1   | 18            |
| <b>PARD6G</b>               |           |               |            |            |               |           |     |         |                         |     |     |               |
| Breast                      | 0         | 978           | 271        | 87         | 852           | 3         | 1   | 45      | 15                      | 0   | 0   | 43            |
| Cervix                      | 0         | 14            | n/a        | n/a        | n/a           | n/a       | n/a | n/a     | 6                       | 0   | 0   | 11            |
| Haematopoietic and lymphoid | 1         | 1057          | 9          | 2          | 192           |           |     |         | 15                      | 0   | 0   | 121           |
| Kidney                      | 0         | 475           | 61         | 18         | 300           | 3         | 0   | 10      | 0                       | 0   | 6   | 27            |
| Lung                        | 3         | 861           | 229        | 39         | 476           | 0         | 2   | 21      | 45                      | 1   | 0   | 136           |
| Liver                       | 0         | 424           | n/a        | n/a        | n/a           | n/a       | n/a | n/a     | 1                       | 0   | 0   | 8             |
| NS                          | 0         | 235           | 1          | 4          | 30            |           |     |         | 98                      | 1   | 0   | 255           |
| Oesophagus                  | 1         | 173           | n/a        | n/a        | n/a           |           |     |         | 18                      | 0   | 0   | 23            |
| Ovary                       | 0         | 504           | 298        | 34         | 462           | n/a       | n/a | n/a     | 16                      | 0   | 0   | 33            |
| Pancreas                    | 0         | 388           | 4          | 0          | 29            | n/a       | n/a | n/a     | 11                      | 0   | 0   | 17            |
| Prostate                    | 0         | 384           | n/a        | n/a        | n/a           | n/a       | n/a | n/a     | 1                       | 0   | 0   | 5             |
| Skin                        | 1         | 321           | n/a        | n/a        | n/a           |           |     |         | 12                      | 0   | 0   | 46            |
| Soft tissue                 | 0         | 16            | n/a        | n/a        | n/a           |           |     |         | 4                       | 0   | 0   | 18            |
| Stomach                     | 0         | 47            | n/a        | n/a        | n/a           |           |     |         | 6                       | 0   | 0   | 20            |
| Urinary tract               | 1         | 103           | n/a        | n/a        | n/a           |           |     |         | 5                       | 0   | 0   | 18            |
