# Supplementary figures and images for: Par6G suppresses cell proliferation and is targeted by loss-of-function mutations in multiple cancers
Source: PubMed Central journal article supplement — Oncogene. 2015 Jun 15;35(11):1386–98. doi: 10.1038/onc.2015.196 (PMC4800288; doi:10.1038/onc.2015.196), 2015-06-15

SUPPLEMENTARY FIGURE 1. Marques et al.

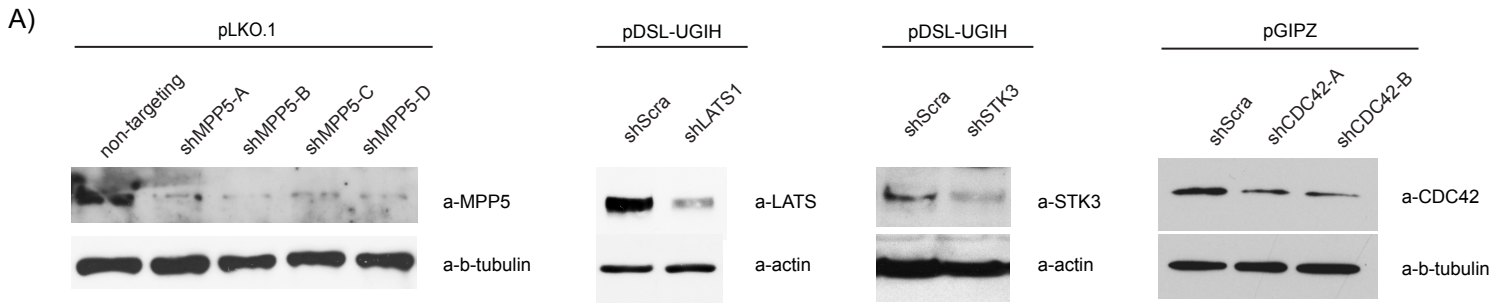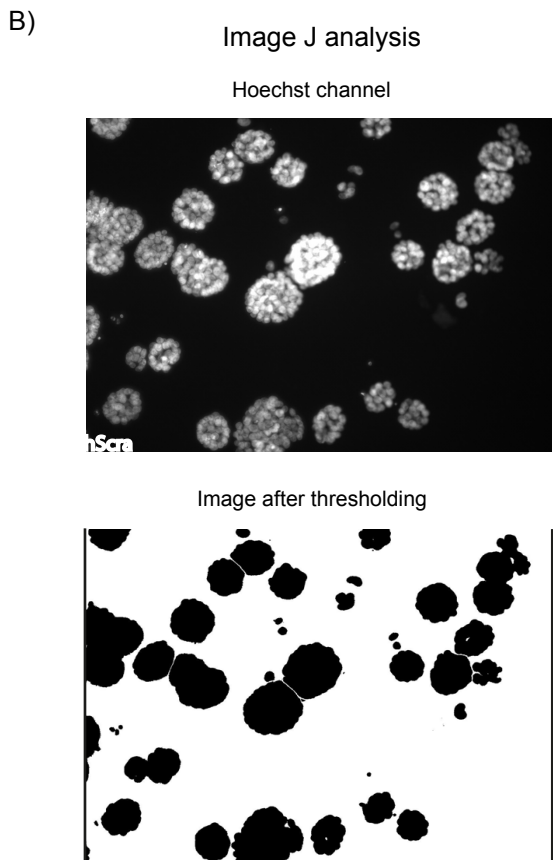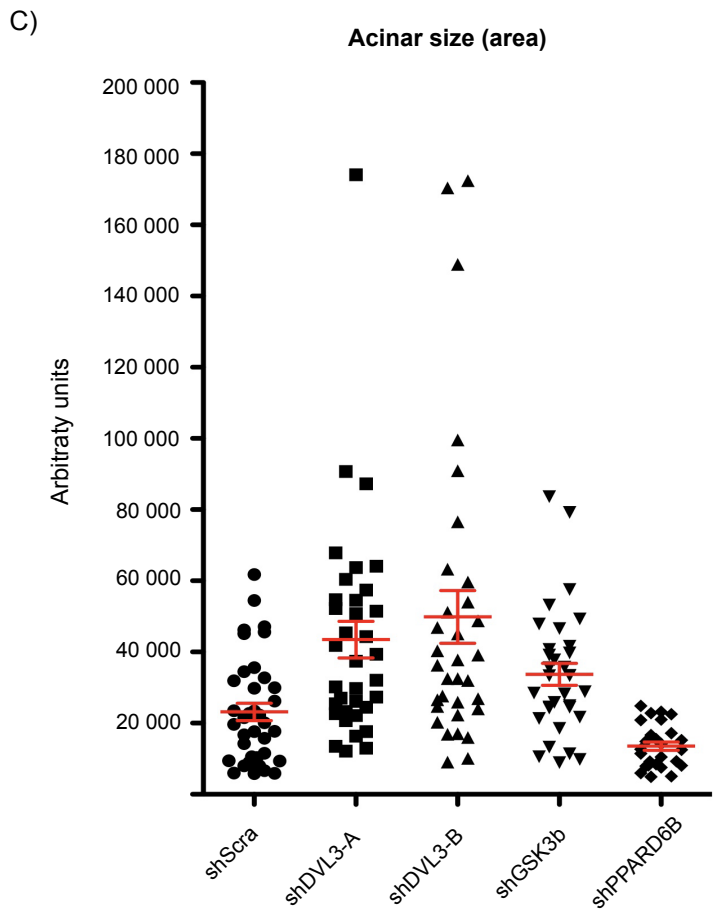

Supplement: onc2015196x2.pdf [file onc2015196x2.pdf]

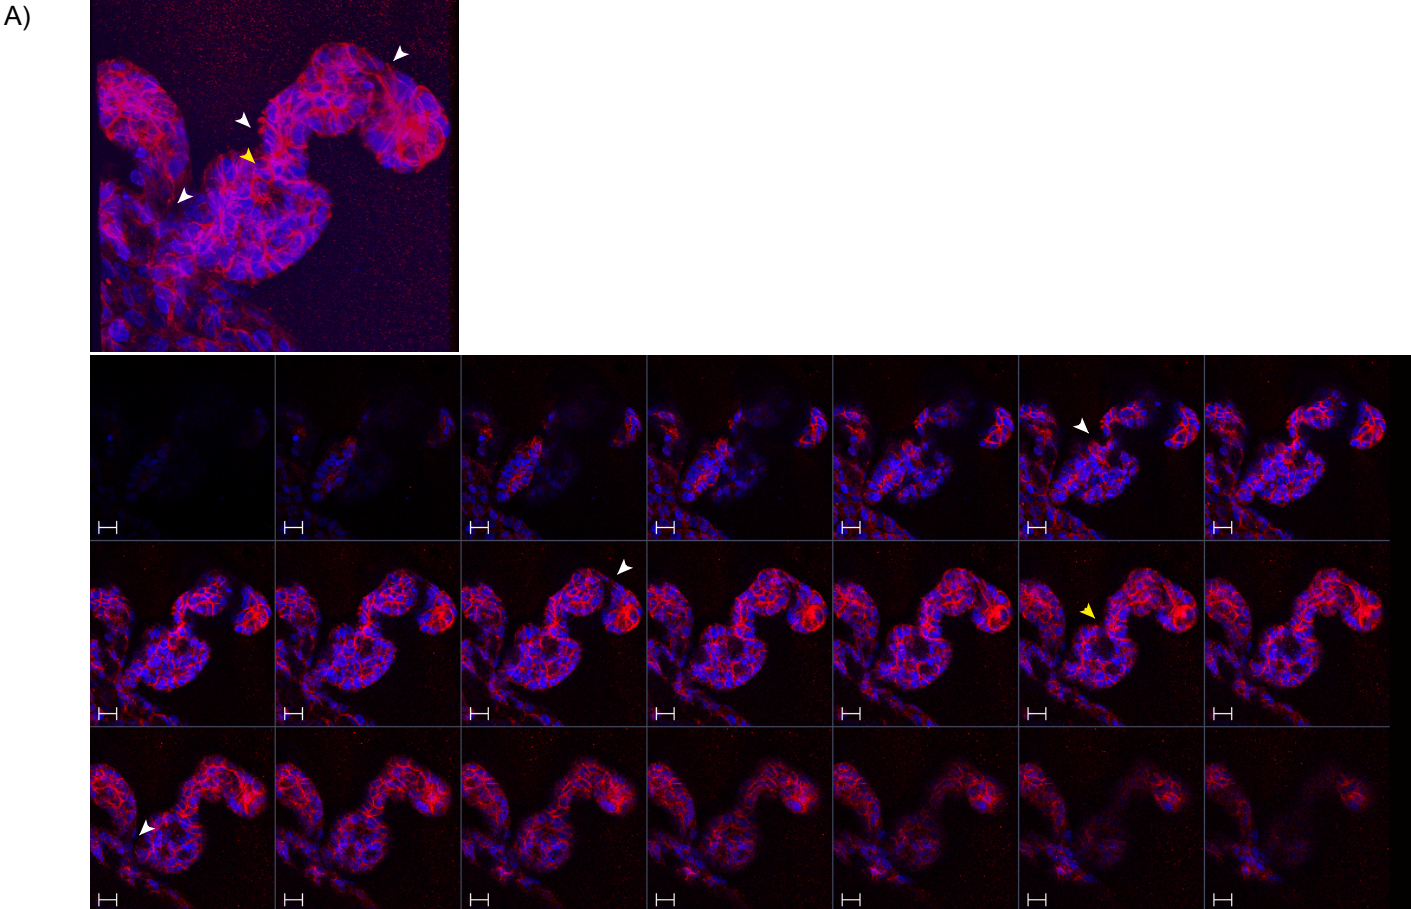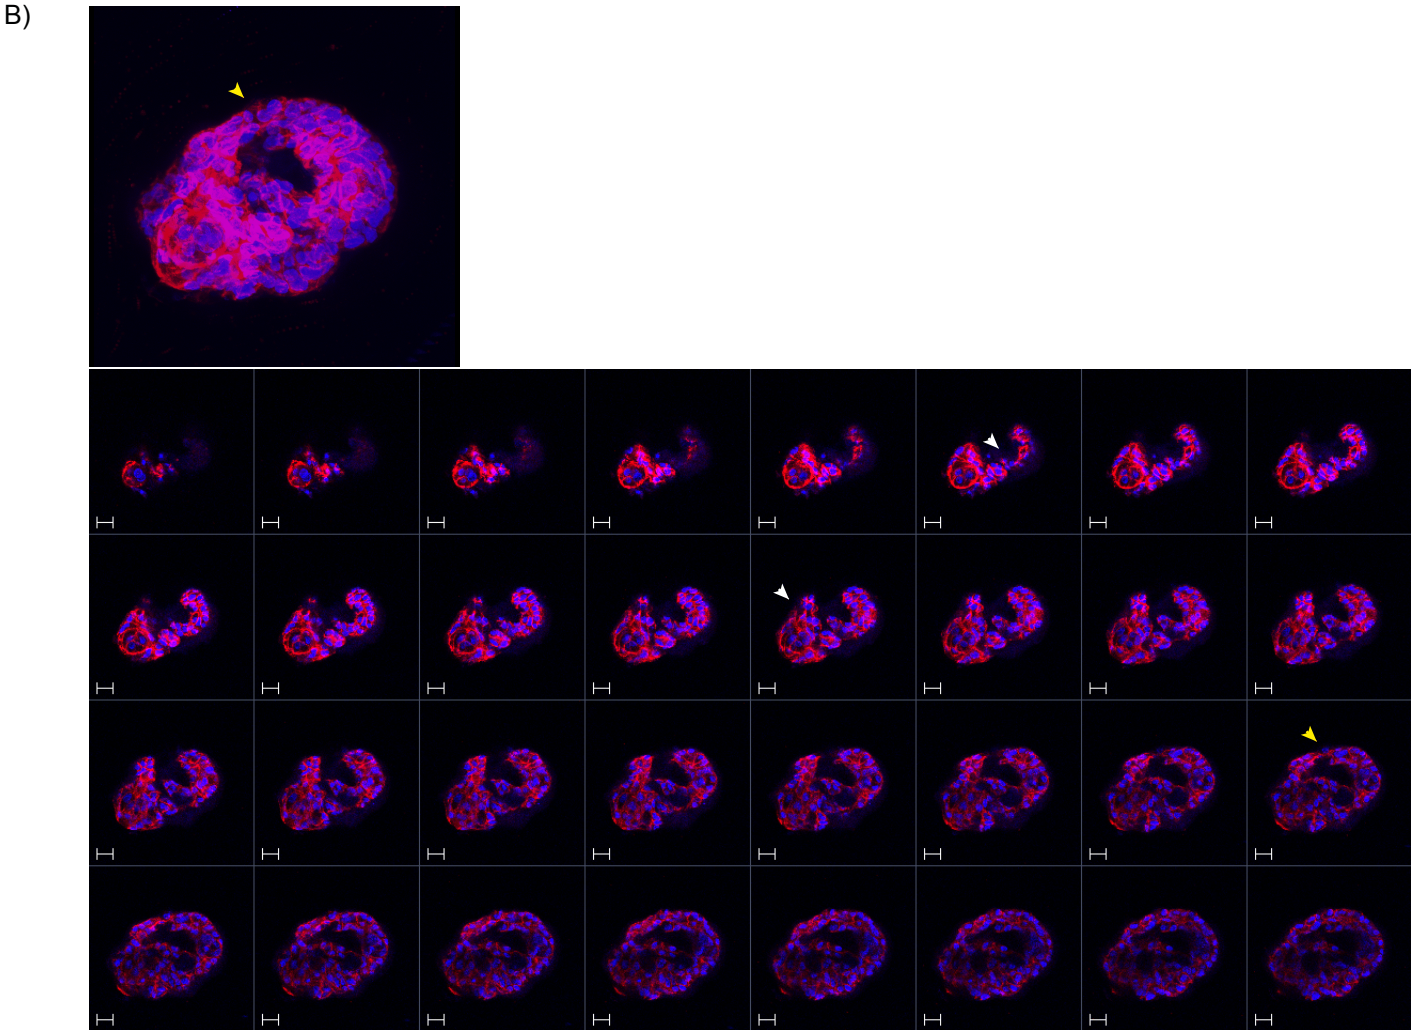

Supplement: onc2015196x3.pdf [file onc2015196x3.pdf]
